# Supplementary material
Source: PubMed Central journal article supplement (PMC6709989)

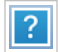

Supplement: NIHMS1015931-supplement-Supplementary_Figures.pdf [file NIHMS1015931-supplement-Supplementary_Figures.pdf]
